# Supplementary material for: Anticholinergic burden and cognitive function in a large German cohort of hospitalized geriatric patients
Source: PubMed Central journal article supplement (PMC5302450; doi:10.1371/journal.pone.0171353), 2017-02-10
Supplement: pone.0171353.s002.pdf [file pone.0171353.s002.pdf]

**S1 table** Assessment of the item dementia of the 4D+S scale

| <b><i>Severity</i></b> | <b><i>Description</i></b>                                                                                                                                                                                                         |
|------------------------|-----------------------------------------------------------------------------------------------------------------------------------------------------------------------------------------------------------------------------------|
| no dementia            | <ul style="list-style-type: none"><li>- normal ageing</li><li>- forgetfulness</li></ul>                                                                                                                                           |
| mild dementia          | <ul style="list-style-type: none"><li>- fails at complex tasks in profession and society (e.g. journey to a new place)</li><li>- needs help with difficult tasks of daily life (e.g. accounting, shopping, invitations)</li></ul> |
| moderate dementia      | <ul style="list-style-type: none"><li>- needs help with selection of clothes and decision to bath</li><li>- needs help with dressing, bathing, toilet</li><li>- urinary incontinence and anal incontinence</li></ul>              |
| severe dementia        | <ul style="list-style-type: none"><li>- ability to speak 6 words</li><li>- cannot speak, sit, laugh</li><li>- cannot hold the head anymore</li></ul>                                                                              |
