# Supplementary material for: Anticholinergic burden and cognitive function in a large German cohort of hospitalized geriatric patients
Source: PubMed Central journal article supplement (PMC5302450; doi:10.1371/journal.pone.0171353), 2017-02-10
Supplement: pone.0171353.s003.pdf [file pone.0171353.s003.pdf]

**S2 table** Correlation between ACB score and various variables

| <b>Variables</b>                          | <b>Kendall's Tau-b</b> | <b>p value</b> |
|-------------------------------------------|------------------------|----------------|
| Age (years)                               | - 0.036                | < 0.001        |
| Sex                                       | - 0.005                | n.s.           |
| Duration of hospital stay (days)          | - 0.030                | < 0.001        |
| Barthel score (admission)                 | - 0.068                | < 0.001        |
| $\Delta$ Barthel                          | - 0.032                | < 0.001        |
| Mini-Mental State Examination (admission) | 0.038                  | < 0.001        |
| Number of drugs per patient               | 0.214                  | < 0.001        |
