# Supplementary material for: Anticholinergic burden and cognitive function in a large German cohort of hospitalized geriatric patients
Source: PubMed Central journal article supplement (PMC5302450; doi:10.1371/journal.pone.0171353), 2017-02-10
Supplement: pone.0171353.s004.pdf [file pone.0171353.s004.pdf]

**S3 table** Univariable analysis of the association of MMSE with various parameters

| <b>Parameter</b>                                            | <b>Odds ratio</b> | <b>95 % CI</b> | <b>p value</b> |
|-------------------------------------------------------------|-------------------|----------------|----------------|
| Age (years)                                                 | 1.038             | 1.035 - 1.040  | < 0.001        |
| Female sex                                                  | 0.988             | 0.953 – 1.023  | n.s.           |
| Number of drugs<br>(per drug)                               | 0.974             | 0.969 – 0.979  | < 0.001        |
| ACB total score<br>(per ACB score<br>unit)                  | 1.070             | 1.056 – 1.084  | < 0.001        |
| Duration of<br>hospital stay<br>(days)                      | 0.988             | 0.986 – 0.990  | < 0.001        |
| Barthel score<br>(admission)<br>(per Barthel<br>score unit) | 0.978             | 0.977 – 0.978  | < 0.001        |
| Barthel score<br>(discharge)<br>(per Barthel<br>score unit) | 0.974             | 0.973 – 0.975  | < 0.001        |
| $\Delta$ Barthel<br>(per Barthel<br>score unit)             | 0.993             | 0.992 – 0.994  | < 0.001        |

n.s. not significant
